# Supplementary material
Source: PubMed Central journal article supplement (PMC3254257)
Supplement: NIHMS334470-supplement-1_si_001.pdf [file NIHMS334470-supplement-1_si_001.pdf]

# Supplementary Information for:

## Synthesis and Evaluation of a Series of Conjugatable 1,2,4,5-Tetrazines for Bioorthogonal Conjugation

Mark R. Karver, Ralph Weissleder and Scott A. Hilderbrand\*

[\*] To whom correspondence should be addressed

### List of Contents:

- (S2) Scheme S1
- (S3) Figure S1
- (S4) Figure S2
- (S5) Figure S3

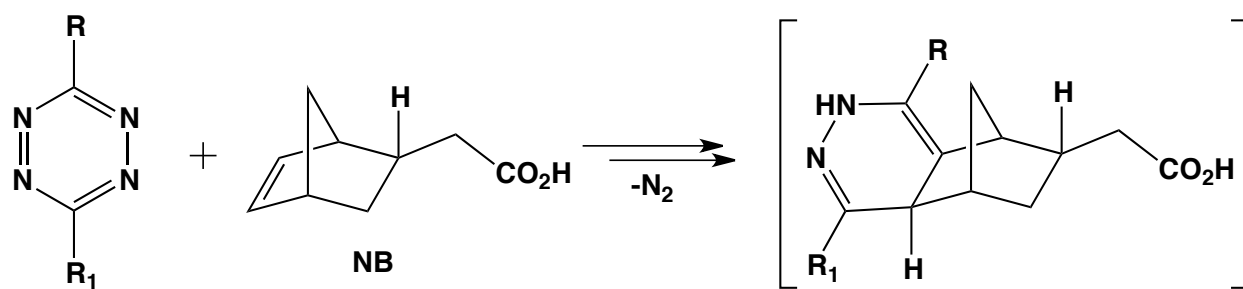

**Scheme S1.** General cycloaddition reaction of (1S,2S,4S)-bicyclo[2.2.1]hept-5-en-2-ylacetic acid (Norbornene, NB) with a generic 1,2,4,5-tetrazine showing one representative reaction product isomer.

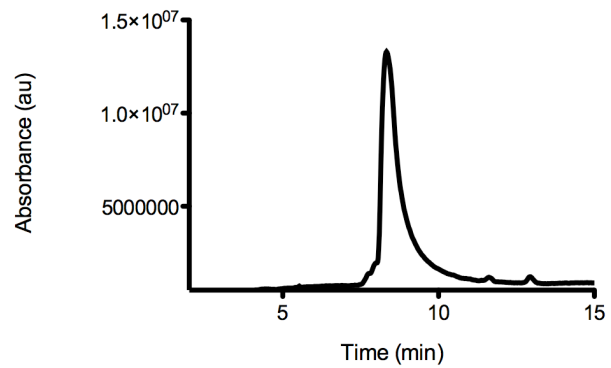

**Figure S1.** HPLC trace of purified AF750-6 using a 0-100% buffer B gradient over 15 min.

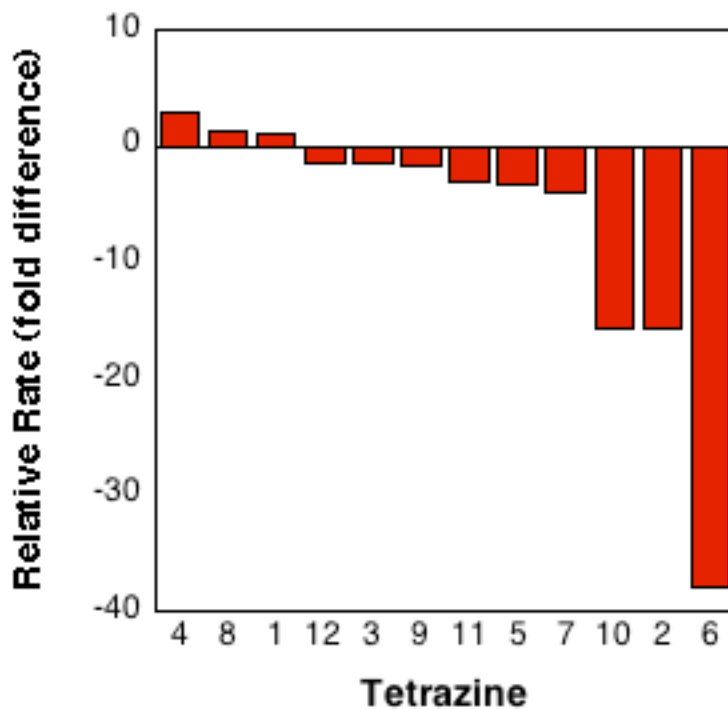

**Figure S2.** Relative second order [4+2] cycloaddition rate constants to **1** (4-(1,2,4,5-tetrazin-3-yl)phenyl)methanamine ( $k_2 = 1$ ) of tetrazines **1-12** with NB in PBS at 37°C.

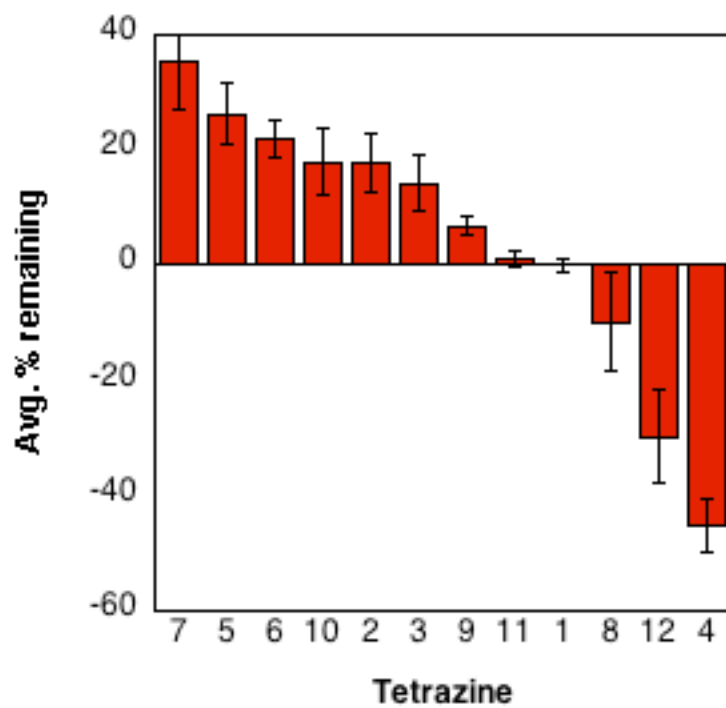

**Figure S3.** Relative tetrazine stability in relation to **1** in PBS after 14 h at 37°C.
